# Supplementary material for: Prevalence and Types of Inappropriate Antibiotics Prescribing Among Dialysis Patients: A Systematic Review
Source: MDPI journal article supplement (doi:10.3390/antibiotics14101049), 2025-10-20
Supplement: s1 [file antibiotics-3869348-supplementary.pdf › antibiotics-3869348-supplementary.pdf]

---

*Systematic Review*

# Prevalence and Types of Inappropriate Antibiotics Prescribing Among Dialysis Patients: A Systematic Review

Sara Abul-Ola <sup>1</sup>, Reem Alenany <sup>1</sup> and Usman Abubakar <sup>2,\*</sup>

<sup>1</sup> College of Pharmacy, QU Health, Qatar University, Doha P.O. Box 2713, Qatar; sa1801871@student.qu.edu.qa (S.A.-O.); ra1702907@student.qu.edu.qa (R.A.)

<sup>2</sup> Department of Clinical Pharmacy and Practice, College of Pharmacy, QU Health, Qatar University, Doha P.O. Box 2713, Qatar

\* Correspondence: usman.abubakar@qu.edu.qa

**Table S1: PubMed Database Search Strategy**

| Concepts           | Sub-terms                                               | Search options | Number of hits  |
|--------------------|---------------------------------------------------------|----------------|-----------------|
| <b>1. Dialysis</b> | 1.1 "renal replacement therapy"                         | MeSH term      | 241,304 results |
|                    | 1.2 "renal dialysis"                                    | Title/abstract | 2,393 results   |
|                    | 1.3 "hemodialysis"                                      | Title/abstract | 76,993 results  |
|                    | 1.4 "haemodialysis"                                     | Title/abstract | 17,398 results  |
|                    | 1.5 "hemofiltration"                                    | Title/abstract | 3,859 results   |
|                    | 1.6 "haemofiltration"                                   | Title/abstract | 1,015 results   |
|                    | 1.7 "hemodiafiltration"                                 | Title/abstract | 2,951 results   |
|                    | 1.8 "haemodiafiltration"                                | Title/abstract | 679 results     |
|                    | 1.9 "hemoperfusion"                                     | Title/abstract | 2,682 results   |
|                    | 1.10 "haemoperfusion"                                   | Title/abstract | 483c results    |
|                    | 1.11 "continuous renal replacement therapy"             | Title/abstract | 4,169 results   |
|                    | 1.12 "crrt"                                             | Title/abstract | 2,879 results   |
|                    | 1.13 "hybrid renal replacement therapy"                 | Title/abstract | 2 results       |
|                    | 1.14 "prolonged intermittent renal replacement therapy" | Title/abstract | 55 results      |
|                    | 1.15 "sustained low efficiency dialysis"                | Title/abstract | 187 results     |
|                    | 1.16 "peritoneal dialysis"                              | Title/abstract | 29,973 results  |
|                    | 1.17 "intermittent hemodialysis"                        | Title/abstract | 1,239 results   |
|                    | 1.18 "intermittent haemodialysis"                       | Title/abstract | 382 results     |
|                    | 1.19 "dialysis"                                         | Title/abstract | 130,909 results |
|                    | 1.20 "intermittent renal replacement therapy"           | Title/abstract | 130 results     |
|                    | Total 1    Combine with OR                              |                | 314,347 results |
|                    | Total 1    Combine with OR, Filter: English, Human      |                | 234,929 results |

|                                |                                                 |                |                 |
|--------------------------------|-------------------------------------------------|----------------|-----------------|
|                                |                                                 |                |                 |
| <b>2. Anti-bacterial</b>       | 2.1 "anti-bacterial agents"                     | MeSH term      | 475,346 results |
|                                | 2.2 "anti bacterial agents"                     | Text Word      | 427,690 results |
|                                | 2.3 "antibacterial agents"                      | Title/Abstract | 9,969 results   |
|                                | 2.4 "antibacterial agents"                      | Title          | 2,047 results   |
|                                | 2.5 "antibiotics"                               | Title/Abstract | 274,357 results |
|                                | 2.6 "antibiotics"                               | Title          | 51,174 results  |
|                                | 2.7 "antibacterial drugs"                       | Title/Abstract | 2,902 results   |
|                                | 2.8 "antibacterial drugs"                       | Title          | 493 results     |
|                                | 2.9 "antibacterial medications"                 | Title/Abstract | 71 results      |
|                                | 2.10 "antibacterial medications"                | Title          | 5 results       |
|                                | Total 2 Combine with OR                         |                | 614,609 results |
|                                | Total 2 Combine with OR, Filter: English, Human |                | 320,056 results |
|                                |                                                 |                |                 |
| <b>3. Prescribing Patterns</b> | 3.1 "drug utilization review"                   | MeSH Terms     | 7,747 results   |
|                                | 3.2 "drug utilization review"                   | Text Word      | 4,154 results   |
|                                | 3.3 "drug utilisation review"                   | Text word      | 28 results      |
|                                | 3.4 "drug utilization evaluation"               | Text Word      | 183 results     |
|                                | 3.5 "drug utilisation evaluation"               | Text word      | 6 results       |
|                                | 3.6 "prescribing patterns"                      | Text Word      | 4,169 results   |
|                                | 3.7 "utilization patterns"                      | Text Word      | 3,174 results   |
|                                | 3.8 "utilisation patterns"                      | Text Word      | 297 results     |
|                                | 3.9 "utilization review"                        | Text Word      | 12,703 results  |
|                                | 3.10 "utilisation review"                       | Text Word      | 76 results      |
|                                | 3.11 "appropriateness"                          | Text Word      | 28,527 results  |
|                                | 3.12 "drug use evaluation"                      | Text Word      | 216 results     |
|                                | 3.13 "drug utilization"                         | MeSH Terms     | 28,787 results  |

|              |                                                    |            |                 |
|--------------|----------------------------------------------------|------------|-----------------|
|              | 3.14 “drug utilization”                            | Text Word  | 27,422 results  |
|              | 3.15 “drug utilization”                            | Text Word  | 555 results     |
|              | 3.16 “inappropriate prescribing”                   | Text Word  | 6,193 results   |
|              | 3.17 “inappropriate prescribing”                   | MeSH Terms | 4,963 results   |
|              | 3.18 “guideline adherence”                         | Text Word  | 37,529 results  |
|              | 3.19 “guideline adherence”                         | MeSH Terms | 35,914 results  |
|              | 3.20 “practice patterns”                           | Text Word  | 81,534 results  |
|              | 3.21 “medication utilization review”               | Text Word  | 6,345 results   |
|              | Total 3    Combine with OR                         |            | 179,927 results |
|              | Total 3    Combine with OR, Filter: English, Human |            | 146,781 results |
| <b>Total</b> | Total 1 AND Total 2 AND Total 3                    |            | 82 articles     |

Table S2: Embase Database Search Strategy

| Concepts                | Sub-terms                                                          | Search options         | Number of hits    |
|-------------------------|--------------------------------------------------------------------|------------------------|-------------------|
| 1. Dialysis             | 1.1 'renal replacement therapy'/syn OR 'renal replacement therapy' | Explosion and synonyms | 267,166 results   |
|                         | Total 1:                                                           |                        | 267,166 results   |
| 2. Antibiotics          | 2.1 'antibiotic agent'/syn OR 'antibiotic agent'                   | Explosion and synonyms | 2,311,054 results |
|                         | Total 2:                                                           |                        | 2,311,054 results |
| 3. Prescribing patterns | 3.1 'drug utilization'/syn OR 'drug utilization'                   | Explosion and synonyms | 30,063 results    |
|                         | 3.2 'drug utilization review'/syn OR 'drug utilization review'     | Explosion and synonyms | 20,222 results    |
|                         | 3.3 'appropriateness':ab,ti                                        | Title/abstract         | 40,041results     |
|                         | 3.4 'prescribing error'/syn OR 'prescribing error'                 | Title/abstract         | 12,524 results    |
|                         | 3.5 'protocol compliance'/syn OR 'protocol compliance'             | Explosion and synonyms | 28,413results     |
|                         | 3.6 'prescribing practice'/syn OR 'prescribing practice'           | Explosion and synonyms | 10,153 results    |
|                         | Total 3: combine with OR                                           |                        | 129,935 results   |
| Total                   | Total 1 AND Total 2 AND Total 3                                    |                        | 325 results       |

**Table S3: Scopus Database Search Strategy**

| Concepts                                        | Sub-terms                                               | Search options            | Number of hits    |
|-------------------------------------------------|---------------------------------------------------------|---------------------------|-------------------|
| <b>1. Dialysis</b><br>Limit to English, article | 1.1 {Renal replacement therapy}                         | Title, abstract, keywords | 63,819 results    |
|                                                 | 1.2 {renal dialysis}                                    | Title, abstract, keywords | 90,374 results    |
|                                                 | 1.3 {kidney dialysis}                                   | Title, abstract, keywords | 444 results       |
|                                                 | 1.4 (hemodialysis)                                      | Title, abstract, keywords | 176,761 results   |
|                                                 | 1.5 (hemofiltration)                                    | Title, abstract, keywords | 12,063 results    |
|                                                 | 1.6 (hemodiafiltration)                                 | Title, abstract, keywords | 7,355 results     |
|                                                 | 1.7 (hemoperfusion)                                     | Title, abstract, keywords | 6,851 results     |
|                                                 | 1.8 {continuous renal replacement therapy}              | Title, abstract, keywords | 8,803 results     |
|                                                 | 1.9 (crrt)                                              | Title, abstract, keywords | 3,279 results     |
|                                                 | 1.10 {hybrid renal replacement therapy}                 | Title, abstract, keywords | 35 results        |
|                                                 | 1.11 {prolonged intermittent renal replacement therapy} | Title, abstract, keywords | 71 results        |
|                                                 | 1.12 {sustained low efficiency dialysis}                | Title, abstract, keywords | 115 results       |
|                                                 | 1.13 {peritoneal dialysis}                              | Title, abstract, keywords | 52,364 results    |
|                                                 | 1.14 {intermittent hemodialysis}                        | Title, abstract, keywords | 1,466 results     |
|                                                 | 1.15 {intermittent haemodialysis}                       | Title, abstract, keywords | 439 results       |
|                                                 | 1.16 (dialysis)                                         | Title, abstract, keywords | 245,196 results   |
|                                                 | 1.17 {intermittent dialysis}                            | Title, abstract, keywords | 221 results       |
|                                                 | 1.18 "intermittent renal replacement therapy"           | Title, abstract, keywords | 230 results       |
|                                                 | Total 3: combine with OR, limit English, article        |                           | 227,002 results   |
|                                                 | Total 3: combine with OR                                |                           | 340,363 results   |
| <b>2. Antibiotics</b>                           | 2.1 "antibacterial agents"                              | Title, abstract, keywords | 24,969 results    |
|                                                 | 2.2 "anti-bacterial agents"                             | Title, abstract, keywords | 315,807 results   |
|                                                 | 2.3 "antibiotic"                                        | Title, abstract, keywords | 1,073,052 results |
|                                                 | 2.4 "anti-biotic"                                       | Title, abstract, keywords | 317 results       |
|                                                 | 2.5 "antibacterial drugs"                               | Title, abstract, keywords | 7,511 results     |
|                                                 | 2.6 "anti-bacterial drugs"                              | Title, abstract, keywords | 219 results       |

|              |                                                  |                           |                   |
|--------------|--------------------------------------------------|---------------------------|-------------------|
|              | 2.7 "antibacterial agent"                        | Title, abstract, keywords | 24,969 results    |
|              | 2.8 "anti-bacterial agent"                       | Title, abstract, keywords | 315,807 results   |
|              | 2.9 "antibacterial medication"                   | Title, abstract, keywords | 202 results       |
|              | 2.10 "anti-bacterial medication"                 | Title, abstract, keywords | 9 results         |
|              | Total 2: combine with OR                         |                           | 1,188,044 results |
|              | Total 2: combine with OR, limit English, article |                           | 806,424 results   |
| 3.           | 3.1 "drug utilization review"                    | Title, abstract, keywords | 5,147 results     |
|              | 3.2 "drug utilization evaluation"                | Title, abstract, keywords | 341 results       |
|              | 3.3 "prescribing patterns"                       | Title, abstract, keywords | 5,489 results     |
|              | 3.4 "utilization patterns"                       | Title, abstract, keywords | 6,258 results     |
|              | 3.5 "utilization review"                         | Title, abstract, keywords | 79,143 results    |
|              | 3.6 "utilization evaluation"                     | Title, abstract, keywords | 578 results       |
|              | 3.7 "appropriateness"                            | Title, abstract, keywords | 56,894 results    |
|              | 3.8 "drug use evaluation"                        | Title, abstract, keywords | 411 results       |
|              | 3.9 "drug utilization"                           | Title, abstract, keywords | 39,537 results    |
|              | 3.10 drug use review                             | Title, abstract, keywords | 167 results       |
|              | 3.11 Drug utilization pattern                    | Title, abstract, keywords | 410 results       |
|              | 3.12 Drug use pattern                            | Title, abstract, keywords | 1,079 results     |
|              | 3.13 "inappropriate prescribing"                 | Title, abstract, keywords | 8,317 results     |
|              | 3.14 "guideline adherence"                       | Title, abstract, keywords | 34,577 results    |
|              | 3.15 "practice patterns"                         | Title, abstract, keywords | 75,213 results    |
|              | 3.16 Medication utilization review               | Title, abstract, keywords | 3 results         |
|              | 3.17 Medication utilization evaluation           | Title, abstract, keywords | 10 results        |
|              | 3.18 Medication use review                       | Title, abstract, keywords | 38 results        |
|              | 3.19 Medication use evaluation                   | Title, abstract, keywords | 200 results       |
|              | Total 3: combine with OR                         |                           | 276,852 results   |
|              | Total 3: combine with OR, limit English, article |                           | 195,177 results   |
| <b>Total</b> | Total 1 AND Total 2 AND Total 3                  |                           | 184 results       |

**Table S4: CINHAL Database Search Strategy**

| Concepts              | Sub-terms                                                    | Search options       | Number of hits |
|-----------------------|--------------------------------------------------------------|----------------------|----------------|
| <b>1. Dialysis</b>    | 1.1 Renal Replacement Therapy+                               | Subject heading (MH) | 38,742 results |
|                       | 1.2 Continuous Renal Replacement Therapy+                    | Subject heading (MH) | 1,489 results  |
|                       | 1.3 Hemodialysis+                                            | Subject heading (MH) | 19,518 results |
|                       | 1.4 Hemofiltration+                                          | Subject heading (MH) | 1,276 results  |
|                       | 1.5 Home Dialysis                                            | Subject heading (MH) | 1,057 results  |
|                       | 1.6 Peritoneal Dialysis+                                     | Subject heading (MH) | 4,464 results  |
|                       | 1.7 Dialysis+                                                | Subject heading (MH) | 27,754 results |
|                       | 1.8 Continuous Venovenous Hemodialysis                       | Subject heading (MH) | 50 results     |
|                       | 1.9 Continuous Arteriovenous Hemodialysis                    | Subject heading (MH) | 13 results     |
|                       | 1.10 Dialysis                                                | Keyword              | 37,147 results |
|                       | 1.11 Hemodialysis                                            | Keyword              | 25,143 results |
|                       | 1.12 Haemodialysis                                           | Keyword              | 14,933 results |
|                       | 1.13 Intermittent Dialysis                                   | Keyword              | 16 results     |
|                       | Total 1: combined with OR, Limiters: English Language; Human |                      | 22,610 results |
| <b>2. Antibiotics</b> | 1.1 Antibiotics+                                             | Subject heading (MH) | 93,567 results |
|                       | 1.2 Antibacterial                                            | Keyword              | 8,073 results  |
|                       | 1.3 Antibacterial drug                                       | Keyword              | 29,111 results |
|                       | 1.4 Antibacterial drugs                                      | Keyword              | 186 results    |
|                       | 1.5 Anti-bacterial agent                                     | Keyword              | 29,050 results |
|                       | 1.6 Anti-bacterial agents                                    | Keyword              | 29,053 results |
|                       | 1.7 Antibacterial agent                                      | Keyword              | 29,260 results |
|                       | 1.8 Antibacterial agents                                     | Keyword              | 29,393 results |
|                       | 1.9 Antibacterial medication                                 | Keyword              | 7 results      |
|                       | 1.10 Antibacterial medications                               | Keyword              | 11 results     |
|                       | 1.11 Anti-bacterial medication                               | Keyword              | 4,136 results  |
|                       | 1.12 Anti-bacterial medications                              | Keyword              | 3,986 results  |



|                                |                                                                    |                      |                |
|--------------------------------|--------------------------------------------------------------------|----------------------|----------------|
|                                | Total 2: combined with OR, Limiters: English Language; Human       |                      | 35,706 results |
| <b>3. Prescribing patterns</b> | 1.1 Utilization Review+                                            | Subject heading (MH) | 13,659 results |
|                                | 1.2 Prescribing Patterns                                           | Subject heading (MH) | 10,412 results |
|                                | 1.3 Medication Errors                                              | Subject heading (MH) | 15,358 results |
|                                | 1.4 Inappropriate Prescribing                                      | Subject heading (MH) | 3,818 results  |
|                                | 1.5 Medication Review                                              | Subject heading (MH) | 240 results    |
|                                | 1.6 Guideline Adherence                                            | Subject heading (MH) | 18,241 results |
|                                | 1.7 Medication utilization review                                  | Keyword              | 44,225 results |
|                                | 1.8 Prescribing error                                              | Keyword              | 122 results    |
|                                | 1.9 Appropriateness                                                | Keyword              | 11,593 results |
|                                | 1.10 Drug Utilization                                              | Keyword              | 9,722 results  |
|                                | 1.11 Protocol compliance                                           | Keyword              | 8,850 results  |
|                                | Total 3: combine with OR, Limiters: English Language; Human        |                      | 33,832 results |
| Total                          | Total 1 AND Total 2 AND Total 3, Limiters: English Language; Human |                      | 21 results     |
